# Supplementary material
Source: PubMed Central journal article supplement (PMC151315)

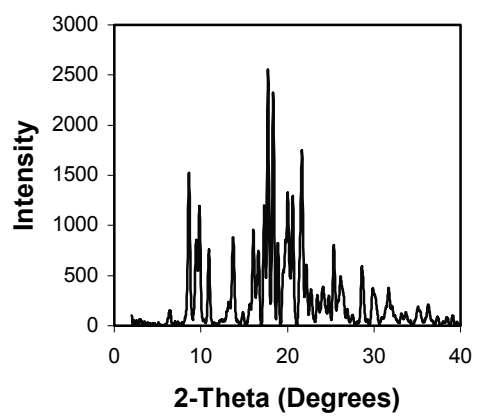

(a)

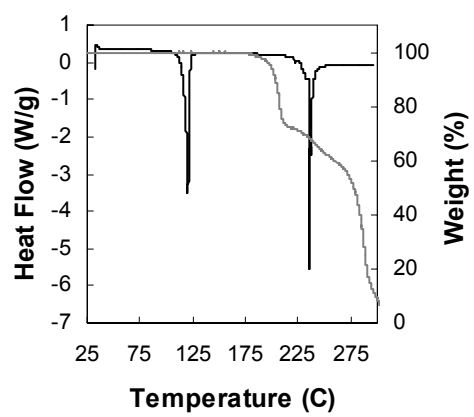

(b)

Supplement: pnas_0437744100_5.pdf [file pnas_0437744100_5.pdf]
